# Supplementary material for: Experimental Investigation of Aerodynamic Characteristics of Bat Carcasses after Collision with a Wind Turbine
Source: Copernicus journal article supplement (doi:10.5194/wes-2019-33), 2019-06-28

# Experimental Investigation of Aerodynamic Characteristics of Bat Carcasses after Collision with a Wind Turbine

Shivendra Prakash<sup>1,2</sup> and Corey D. Markfort<sup>1,2</sup>

<sup>1</sup>IHR-Hydroscience and Engineering, The University of Iowa, Iowa City, IA 52242, USA.

5 <sup>2</sup>Civil and Environmental Engineering, The University of Iowa, Iowa City, IA 52242, USA.

*Correspondence to:* Corey D. Markfort (corey-markfort@uiowa.edu)

**Abstract.** A large number of bat fatalities have been reported in wind energy facilities in different regions globally. Wind farm operators are required to monitor bat fatalities by conducting carcass survey at wind farms. A previous study implemented the ballistics model to characterize the carcass fall zone distributions after strike with turbine blades. Ballistics model considers the aerodynamic drag force term which is dependent upon carcass drag coefficient. The bat carcass drag coefficient is highly uncertain and of which no measurement is available. This manuscript introduces a methodology for bat carcass drag coefficient estimation. Field investigation at Macksburg wind farm resulted in the discovery of three bat species: Eastern Red bat (*Lasiurus borealis*), Hoary bat (*Lasiurus cinereus*) and Evening bat (*Nycticeius humeralis*). Carcass drop experiments were performed from a dropping platform at finite height and carcass position time series data were recorded using a high-speed camera. Falling carcasses were subjected to aerodynamic drag and gravitational forces. Carcasses were observed to undergo rotation, often rotating around multiple axes simultaneously, as well as lateral translation. The complex fall dynamics along with drop from a limited height prohibits the carcasses from attaining terminal velocity. Under this limitation, drag coefficient is estimated by fitting a ballistics model to the measured velocity. Multivariable optimization was performed to fit the ballistics model to measured velocity resulting in an optimized estimate of drag coefficient. A sensitivity analysis demonstrated significant variation in drag coefficient with small change in initial position highlighting the chaotic nature of carcass fall dynamics. **Based on the limited sample, the bat carcass drag coefficient and terminal velocity were found to be between 0.70 – 1.23 and 6.63 – 17.57 m/s, respectively. The maximum distance carcasses are predicted to fall after impact with a typical utility-scale onshore wind turbine was computed using a 2-D ballistics model. Based on the range of drag coefficients found in this study, Hoary and Evening bats are estimated to fall within the rotor plane up to a maximum distance of 92 m and 62 m, respectively, from the wind turbine tower. Ballistics model of carcasses after strike by wind turbine blades can be used to obtain fall distributions for bats, guide carcass survey efforts, and correct survey data for limited or unsearched areas.**

## 30 1 Introduction and Review

Carbon emissions and subsequent climate change has motivated nations across the globe to develop energy sources, alternative to fossil fuels, including wind energy. As a result, global wind energy production is continuously increasing with an average growth rate of 25% per year and 69% increase in wind energy estimated globally in 2018 and 2019 (US Energy Information Administration (2018)). Although wind energy is a renewable energy source, the vast development of wind facilities presents a threat to wildlife, especially to bats (Loss et al. (2013), Smallwood (2013), Erikson et al. (2014)). Wind power development causes indirect impacts through alteration and loss of bats habitat due to construction, installation, and operation of wind turbines (Kuvlesky et al. (2007)). A more direct impact of wind energy are thousands of annual bat fatalities caused by the collision of flying bats with the spinning blades (Orloff and Flannery (1992), Kunz et al. (2007), Arnett et al. (2008), Hayes (2013), Smallwood (2013)). Linderboom et al. (2011) investigated the ecological effects of an operational offshore wind farm in Netherlands and identified bird collision with moving blades as a significant impact. In fact, bat mortality has been reported at every wind energy facility studied (GAO (2005); Kingsley and Whittam (2007); Kunz et al. (2007); Kuvlesky et al. (2007); NAS (2007); Arnett et al. (2016)).

Several studies have applied different methods to estimate the number of bats killed at wind energy facilities in the United States. Kunz et al. (2007) used model and survey data to estimate bat fatalities and found that annually 33,000 – 111,000 bats would be killed at wind energy fatalities. Cryan (2011) estimated annual bat fatalities at 450,000 in North America based on a bat fatality rate of 11.60 bats/MW/yr. While Smallwood (2013) estimated 888,000 bats were killed in the United States in 2012; Hayes (2013) concluded that, in 2012, over 600,000 bats are likely to have died in the United States as a result of direct interactions with wind turbines. Since many bat species give birth to only one pup per year and bats have high mortality rates during the first year of their life (O'shea et al. (2004), Hallam and Federico (2009)), the estimated numbers of annual bat fatalities is considered to be significant. Kuik et al. (2016) concluded that bird and bat collision with rotating blades is one of the significant negative impacts of wind farm projects and emphasised biodiversity protection in identifying the ecological and economical challenges. It is not possible to prevent all bat deaths caused by wind turbines. However, bats on the United States Fish and Wildlife Service's (USFWS) Threatened and Endangered Species list must be monitored, and wind energy facilities must be permitted to ensure that allowable mortality rates or so-called take are not exceeded.

The USFWS requires wind farm operators to perform carcass surveys within a specified radius around wind turbines to estimate bat take. However, guidance for the prescribed search radius around turbines is based on limited data. This could result in surveys conducted where bats are unlikely to be found, or limited search areas could miss bat carcasses that land outside the survey area. Turbine operators need a reliable method to guide survey efforts, to determine the appropriate extent of surveys targeting only areas where bat carcasses are likely to be found around the turbines. A technically defensible survey is critical to help operators determine whether wind turbines adversely affect listed species and to evaluate project impacts.

Figure 1 shows a schematic of the three-blade horizontal axis turbine with associated components including the tower, hub, rotor blades, and rotor swept area. The vertical distance from the ground to the turbine hub is called the hub height. In Fig. 1, three rotor blades are denoted in grey colour and the red dotted periphery indicates the rotor swept area.

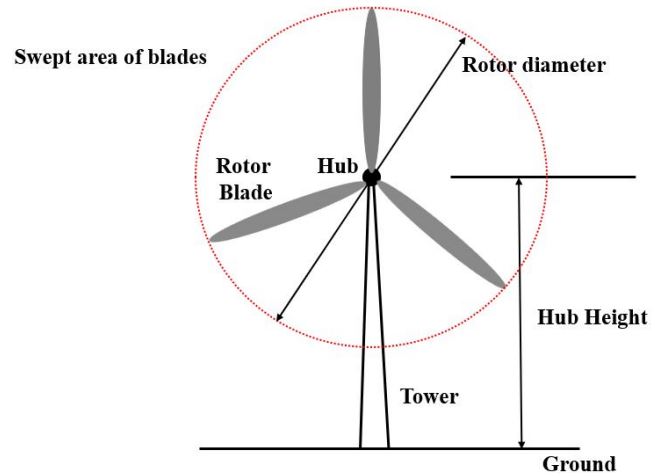

65

**Fig. 1: Schematic of the typical utility-scale, three-blade, horizontal axis wind turbine**

Only a few studies, including Arnett (2005) and Smallwood and Thelander (2005) have estimated the fall zone for birds and bats, to guide carcass search area. Osborn et al. (2000) quantified the search area by dropping carcasses from the nacelle and the upper and lower bounds of the rotor-swept area on days with the brisk wind. However, this method did not consider the effect of impact with rotating blades on the carcass fall trajectory. Gauthreaux (1996) suggested that the search area should be circular, with a minimum radius proportional to the height of the turbine. He suggested the search area to be within 70 m of a wind turbine. Thelander and Runge (2000) found the average fall distance of birds to be 20.20 m, with 75% of birds falling less than 30 m away from the tower. It is not clear whether some of these studies have bias in search radius estimates due to insufficient search zones. Smallwood (2007) mentioned that inadequate search radius could cause bias in the carcass survey data.

Huso and Dalthorp (2014) proposed polynomial logistic regression models of relative carcass density as a function of distance from the nearest turbine. The study considered the carcass search locations at several turbine sites in Philadelphia: 15 turbines at Locust Ridge in 2010, and 22 turbines and 15 turbines at Casselman, in 2008 and 2011 respectively. The best-fit logistic model of carcass densities was found to be cubic for Casselman and linear for Locust Ridge. This study limited the search area for bat carcasses to 80 m. If the bat carcasses land beyond the 80 m distance, the surveyor misses those bat carcasses.

Additionally, investigators have applied physics-based models for estimating the trajectory of objects thrown from turbine blades, including ice fragments and parts of broken blades. Biswas et al. (2011) used a ballistics model to estimate the trajectories and landing zones of ice fragments thrown from wind turbine blades. They considered a turbine with 45 m long

blades and hub height of 100 m and found ice fragments could travel up to 350 m from the base of the turbine. Sarlak and Sørensen (2015) investigated the trajectories of thrown objects from a 2.3 MW horizontal axis wind turbine upon blade failure. They found that under normal operating conditions, the blade fragments can land between 100 – 500 m, depending on their size. Both studies solved the equations describing the physics of ballistics using the fourth order Runge-Kutta (RK4) numerical scheme.

Hull and Muir (2010) (referred to as HM10) utilized ballistics theory to propose a model to estimate the fall zone of different sized bird and bat carcasses struck by different sized turbines. The two-dimensional (2-D) ballistics model describes the trajectory of bat carcasses, within the rotor plane, by relating the variation in fall velocity to the net resultant forces on a carcass, which include gravitational and aerodynamic drag forces. HM10 also employed the RK4 method to numerically integrate the ballistics model and determine the position and velocity of the carcass relative to the turbine base at each time step. They assumed bats are incapacitated after blade strike and therefore unable to affect their fall trajectory. They also assumed carcasses would be stationary in the rotor plane before being hit by the blade, and therefore did not account for any initial pre-collision velocity. They also assumed calm conditions with no turbulence, resulting in no wind drift effects on the carcasses fall trajectory, and they assumed an equal likelihood of strike anywhere in the rotor-swept area. They modelled a carcass as a tumbling object, allowing the projected area and drag coefficient ( $C_d$ ) to change randomly during the fall. They performed simulations assuming a coefficient of restitution ( $e$ ) of zero. **The coefficient of restitution is a factor that determines the fraction of energy transferred from the turbine blade to the bat carcass. It is defined as the ratio between the restoration and deformation impulses in a direction normal to the plane of contact. The factor incorporates effects of orientation at the moment of strike and contact time of a bat with a turbine blade. The value of  $e$  varies between a  $e = 0$ , representing a fully inelastic collision to  $e = 1$ , representing a fully elastic collision.** Finally, HM10 proposed a simple multiple linear regression model considering hub height and rotor radius as input variables to estimate the carcass search radius.

The maximum distance a bat carcass falls away from the base of a turbine after collision with a rotating blade is governed by a number of factors, but arguably the most uncertain are the carcass aerodynamic characteristics. To compute the drag force, HM10 assumed a standard drag model proportional to the carcass fall speed squared. The proportionality constant,  $C_d$  for bat carcasses was assumed to be 1.00 and to randomly vary between 0.875 – 1.125. The drag coefficient is a measure of the effectiveness of a streamlined object in reducing the fluid resistance faced by the object motion. Low drag coefficient means that the streamlined shaped object is enabled to move easily through the ambient fluid due to minimum resistance whereas high drag coefficient implies the poor streamlining of the object causing the high resistance to motion.

There is little guidance available for the appropriate drag coefficient  $C_d$  when modeling the ballistics of bats, particularly for carcasses of different species. Norberg (1976) proposed a  $C_d$  range of 0.40 – 1.20 for a flying long-eared bat. But this is only applicable for live bats. HM10 indicated that little evidence exists to understand the aerodynamic characteristics of injured birds and bats. Hedenström and Liechti (2001) estimated  $C_d$  of passerine birds by measuring their terminal dive speed. They stated that some passerine birds terminate their migration by diving abruptly toward the ground before landing. They measured dive trajectories by tracking birds with radar. They maintained a tracking time long enough to allow the diving

birds to attain terminal velocity and estimated drag coefficient by balancing drag force with the weight of the bird. Based on measurements for 39 cases of diving birds, drag coefficient was estimated to be  $0.37 \pm 0.13$ . Haider and Levenspiel (1989) argued the terminal velocity, rather than the drag coefficient, may be of ultimate interest. The benefit of terminal velocity as a metric for aerodynamic characteristics is that projected area does not need to be characterized.

Given the lack of available measurements of  $C_d$  for bat carcasses and the large range of previously reported values, which are limited to a specific species of live bats and birds, modelled carcass fall-zone distribution and maximum fall distance remain highly uncertain. Reliable estimates of  $C_d$  for individual species with different mass, size, and shape are needed to accurately model carcass fall trajectories and to determine the maximum fall distance. The main objective of the present study is to estimate the drag coefficient ( $C_d$ ) of bat carcasses using ballistics theory with data collected from bat carcass drop experiments. For the first time, fresh carcasses were dropped and tracked using high-speed cameras. The measured time vs. position data with well-known physics describing ballistics was used to obtain the first direct estimates for a range of bats commonly impacted by wind turbines.

The following sections are organized as follows: The experimental methodology presents the research design for estimation of carcass drag coefficient, the description of the ballistics model, experimental set up, data acquisition, limitations of the measured data, and the  $C_d$  estimation algorithm (details are discussed in supplementary information (SI) document). Following the methodology section, we present results for the estimated drag coefficients and terminal velocity. We briefly explore the fall zone histograms following HM10 to demonstrate the sensitivity of fall distances to the choice of drag coefficient. Finally, we present a summary and conclusions from the study.

## 2 Methodology

### 2.1 Research Design for Drag Coefficient Estimation

The following methodology was employed to determine drag coefficients for bat carcass:

1. Collect fresh bat carcasses representing a range of species and perform carcass drop experiments to acquire the time vs. position data during each fall.
2. Evaluate if the carcasses attains terminal velocity during the fall. If a carcass attains terminal velocity, calculate a drag coefficient by equating the drag force to the carcass weight.
3. If carcasses do not attain terminal velocity, estimate the carcass drag coefficient by fitting the ballistics model to the measured velocity.

### 2.2 Ballistics Model Description

Motion of falling bodies can be described physically based on projectile and ballistics models. The projectile motion of an inertial particle only considers the influence of gravity on the fall trajectory and neglects aerodynamic drag. An analytical solution of projectile motion can easily be obtained and applied to evaluate trajectories. However, drag can significantly alter

the particle trajectory, and therefore, a more realistic description of motion follows the ballistics model, which incorporates  
 150 the quadratic drag model to account for the effect of fluid resistance. A simplified, 2-D version of the ballistics model was  
 employed by HM10, employing the following set of equations describing the ballistics motion for velocity and acceleration of  
 a bat carcass:

$$\frac{d\mathbf{x}_p}{dt} = \mathbf{u}_p \quad (1)$$

$$\frac{d\mathbf{u}_p}{dt} = -\frac{\rho_f C_d A_p |\mathbf{u}_p - \mathbf{u}_f| (\mathbf{u}_p - \mathbf{u}_f)}{2m_p} - \mathbf{g}$$

where  $m_p$  is carcass mass,  $A_p$  is carcass projected area,  $C_d$  is carcass drag coefficient,  $\mathbf{u}_f$  is the fluid velocity vector,  $\mathbf{u}_p$  is the  
 carcass velocity vector,  $\mathbf{x}_p$  is the fall position of a carcass with respect to turbine base,  $\rho_f$  is the fluid density, and  $\mathbf{g}$  is  
 155 gravitational acceleration vector. The equations of motion described here are coupled nonlinear equations. The analytical  
 solution of one-dimensional (1-D) ballistics model for an isotropic object falling from rest in quiescent flow condition can be  
 obtained. For any object falling along vertical direction ( $z$ ) from rest in quiescent flow, Eq. (1) can be rewritten in the following  
 form (upward (+) and downward (-)):

$$\frac{dw}{dt} = \frac{\rho_f C_d A_p w^2}{2m_p} - g \quad (2)$$

By integrating Eq. (1), the analytical expression for carcass instantaneous velocity ( $w(t)$ ) with zero initial velocity ( $w$  at ( $t =$   
 160  $0) = 0$ ) can be expressed as:

$$w(t) = w_t \tanh\left(\frac{-gt}{w_t}\right) \quad (3)$$

where  $w_t = (2m_p g / \rho_f C_d A_p)^{1/2}$  is the terminal velocity attained by the carcass under dynamic equilibrium condition and  $w(t)$  is  
 the instantaneous velocity. By integrating Eq. (3) with respect to time, the analytical solution for carcass instantaneous position,  
 $z(t)$ , can be obtained as:

$$z(t) = z_0 - \frac{w_t^2}{g} \ln\left(\cosh\left(\frac{gt}{w_t}\right)\right) \quad (4)$$

where,  $z_0$  is the carcass drop height at time  $t = 0$ .

165 Figure 2 (a) represents the time vs. velocity plot obtained from the analytical solution of the ballistics model (Eq. (3)) by  
 considering the mean values of  $m_p = 14$  g,  $A_p = 28$  cm<sup>2</sup> and  $C_d = 1$  for bat carcass from HM10. The acceleration curve in Fig.  
 2 (a) shows a falling carcass follows three phases:

- 170 I. Initial projectile phase: In this phase, the carcass starts from rest, gaining yet small magnitude of velocity entirely due to the force of gravity. As a result, the resistive drag force is negligible compared to the gravitational force. This stage of fall is represented by “Phase I” in Fig. 2 (a) highlighting the net acceleration being nearly constant.
- 175 II. Transition phase: In this phase, the resistive drag force gains more strength because of increase in velocity and eventually equals the gravitational force to attain the terminal velocity. The transition phase represents fall dynamics when both gravity and drag forces are important in determining the net acceleration. Graphically, it can be seen in “Phase II” of Fig. 2 (a) where the velocity asymptotically transitions between the gravity dominant phase and terminal velocity phase. The magnitude of the resistive drag force is dependent on the empirical drag coefficient ( $C_d$ ) of bat carcasses.
- 180 III. Terminal velocity phase: In this phase, the carcass attains terminal velocity, as the drag force equals the gravitational force. **The terminal velocity of this particular bat carcass (from HM10) is found to be 9 m/s.** This feature in Fig. 2 (a) is evident by the levelling off of the curve (“Phase III”) when the carcass velocity becomes constant during the later stages of the fall.

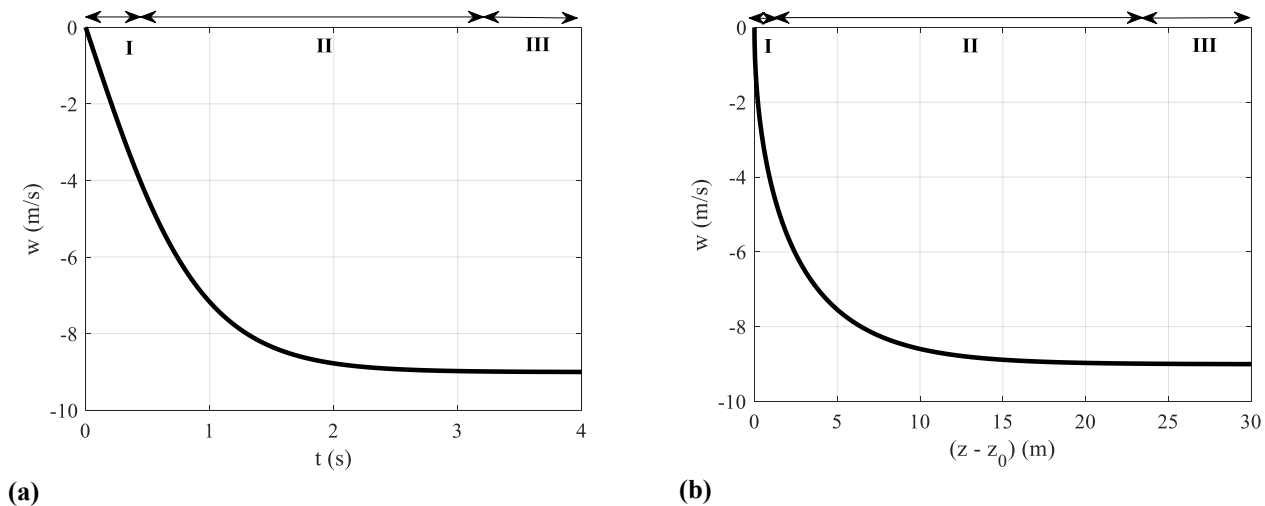

**Fig. 2: (a) Ballistics fall curves illustrating three fall phases: I, II and III, and (b) Velocity vs. position relative to the drop height  $z_0$**

A common approach for measuring the drag coefficient of an object is to drop the object and allow it to achieve terminal velocity, and then relate the result and the weight assuming the drag and gravitational forces are in balance. Figure 2

(b) shows the velocity vs. position plot for the initial drop height ( $z_0$ ) of zero. This gives an estimate of the height from which the carcass must be dropped to attain terminal velocity. It is shown in Fig. 2 (b) that the dropped bat carcass attains a terminal velocity of 9 m/s after falling a distance of 24 m. This indicates that drop experiment intended to compute the drag coefficient must be dropped from a height of approximately 30 m from the ground.

### 2.3 Experimental Equipment, Materials and Procedures

185 The ballistics model is useful for guiding carcass surveys, if it can accurately predict carcass fall trajectories. This can only be done if the aerodynamics of the carcasses are known. Given the lack of available  $C_d$  measurements for bat carcasses, carcass drop experiments were performed with specimens discovered at a wind farm using a high-speed camera. Biologists discovered three fresh bat carcasses for three species at the Macksburg wind farm in Iowa, while conducting post-construction surveys on the day of the experiment. They included Eastern Red bat (*Lasiurus borealis*), Hoary bat (*Lasiurus cinereus*), and Evening bat  
190 (*Nycticeius humeralis*). Macksburg wind farm consists of 52 Siemens SWT – 2.3 MW wind turbines. The turbine rotor has a radius of 54 m and a hub height of 80 m. The mass, body length (excluding tail), and lateral body dimension of the bat carcasses were measured using an electronic weighing scale and a ruler, respectively. The body dimensions measurements were used to compute the carcass projected area ( $A_p$ ).

195 Firstly, the irregularly shaped carcass was approximated as an ellipsoid (Fig. 3). The symbols  $a$  and  $b$  ( $= c$ ) represents the dimensions along the ellipsoid semi – major and semi – minor axis, respectively. The carcass projected area ( $A_p$ ) was computed as  $\Pi/4 d_{eq}^2$ , where  $d_{eq}$  is the equivalent diameter of the sphere having the same volume as that of the ellipsoid shaped bat of dimensions  $a$ ,  $b$ ,  $c$ . Equating the volume of a sphere (left hand side) with an ellipsoid (right hand side) in Eq. (5) gives equivalent diameter (Eq. (6)). The wings of the bat are assumed to be folded and flush with the body during the fall as observed from the high – speed images of the carcass drop experiments, which as a result eliminates a source of uncertainty in the  
200 projected area computation. It is possible that the wing may be severely broken during blade strike, and therefore this simplification may not be applicable in all carcass fall cases.

$$\frac{\pi}{6} \pi d_{eq}^3 = \frac{4}{3} \pi abc \quad (5)$$

$$d_{eq} = 2\sqrt[3]{abc} \quad (6)$$

205



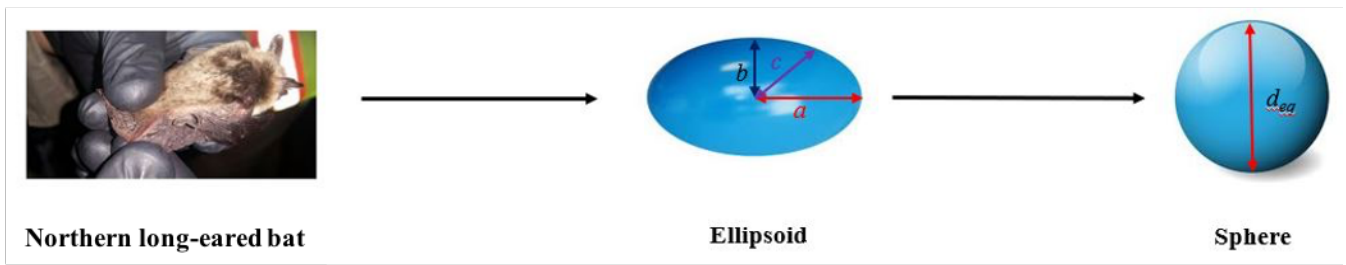

**Fig. 3: Illustration of the simplified geometric representation of bats for the ballistics model. The image is of a Northern long-eared myotis by WEST, Inc. (2016)**

Table 1 lists the mass, body dimensions, equivalent diameter and projected area of bat carcasses discovered on the day of the experiments. The range of bat carcass mass and size are represented by a large, medium, and small bat. Hoary bat was the largest with a significantly larger mass and area than the others, whereas the evening bat was the lightest and smallest bat.

**Table 1: Physical properties of freshly discovered bat carcasses**

| Species         | $m_p$ (g) | $a$ (cm) | $b$ & $c$ (cm) | $d_{eq}$ (cm) | $A_p$ (cm <sup>2</sup> ) |
|-----------------|-----------|----------|----------------|---------------|--------------------------|
| Hoary bat       | 24        | 7.60     | 3.80           | 4.80          | 18                       |
| Eastern Red bat | 9.70      | 5        | 2.50           | 3.20          | 8                        |
| Evening bat     | 1.50      | 3.80     | 1.90           | 2.40          | 4.50                     |

Figure 4 shows an annotated composite image of the bat carcass drop experiment, showing a carcass at four instances. Freshly collected carcasses were dropped in front of a 6.3 m high wall on the leeward side of a building to achieve approximately quiescent or no wind conditions. For each species, two experiments were performed and recorded using a high-speed camera to extract the time series of carcass position. The wall was marked using horizontal strips of tape over a total distance of 4.50 m. A schematic of the side view of the experimental set-up is shown in Fig. 5. The figure includes illustration of various experiment components, including the location of the wall with markings, the location of the camera and its field of view, and the position of the dropping platform. The carcass drop tests were performed from a dropping platform located 1 m in front of the wall ( $y_2$  in Fig. 5). A high-speed camera from Integrated Design Tools, Inc. (IDT, NX4-S2 model), Pasadena, California, was used to record the carcass drop experiments. The camera was mounted on a tripod positioned 18 m distance from the wall ( $(y_1 + y_2)$ , as shown in Fig. 5). The array size of the images acquired by the camera was  $1024 \times 1024$  pixels. Black tape markings on the wall were precisely spaced as shown and were used to calibrate the images to determine the size of a single pixel. It was determined that the pixel resolution was 7.10 mm. The camera was set to record at 500 frames per second, giving a temporal resolution of 0.002 s.

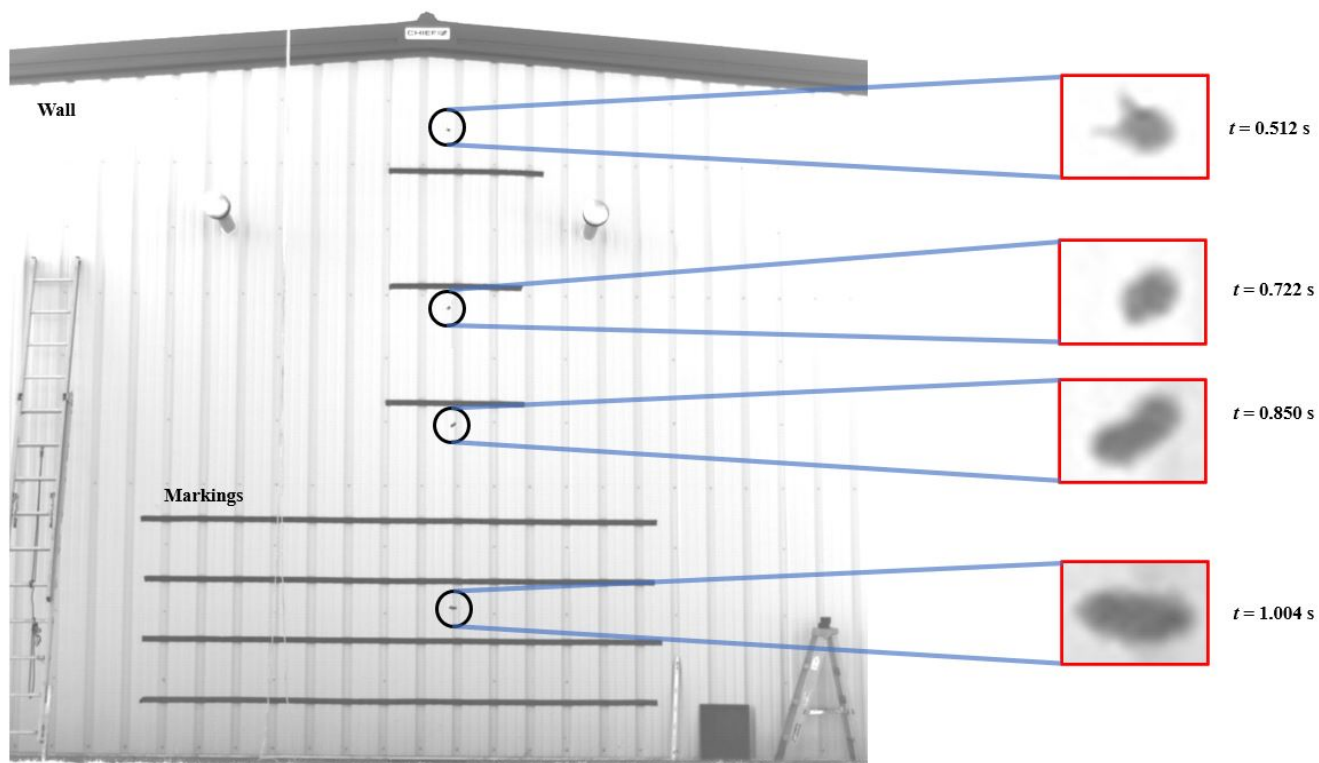

Fig. 4: Composite image illustrating an example carcass drop experiment (drop test #1 for Hoary bat)

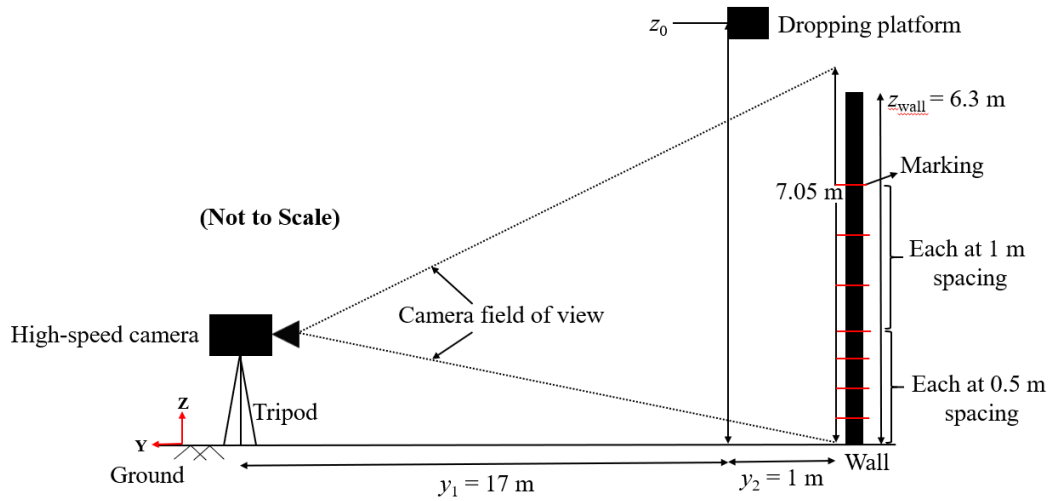

**Fig. 5: Schematic of the side view of the carcass drop experimental set-up**

230 The images obtained from the high-speed video recording were used to determine the vertical position ( $z$ ) of the bat carcass at a specific instant. Bat carcasses are irregularly shaped and have a finite size. Motion Studio X64 software which includes applications for the operation of the IDT high-speed digital cameras, was used to extract the carcass pixel information from each image frame containing a falling carcass. For example, Figure 6 (a) shows is a cropped image recorded at  $t = 0.722\text{s}$  of drop test #1 for the Hoary bat carcass. The position of the carcass is measured by determining the location of the centre of the carcass image. In this example we can see the top and bottom of the carcass in the image and determine the corresponding coordinates, i. e.,  $(z_{\text{pixel}})_{\text{top}}$  and  $(z_{\text{pixel}})_{\text{bottom}}$ . The values of  $(z_{\text{pixel}})_{\text{top}}$  and  $(z_{\text{pixel}})_{\text{bottom}}$  were found to be 449 pixels and 454 pixels respectively (see Fig. 6 (a)). The centroid is found to be at 451.50 pixels. Applying the image calibration of 7.10 mm/pixel gives the carcass position with respect to the ground ( $z = 3.86 \text{ m}$ ). This procedure was carried out for each carcass image recorded during carcass drop experiment. The internal timer of the camera provided a timestamp for each image, which was

235

240 used with the position data to generate a time vs. position time series. With a time resolution of  $\Delta t = 0.004 \text{ s}$ , a plot of time vs. height is shown for test #1 for the Hoary bat (Fig. 6 (b)).

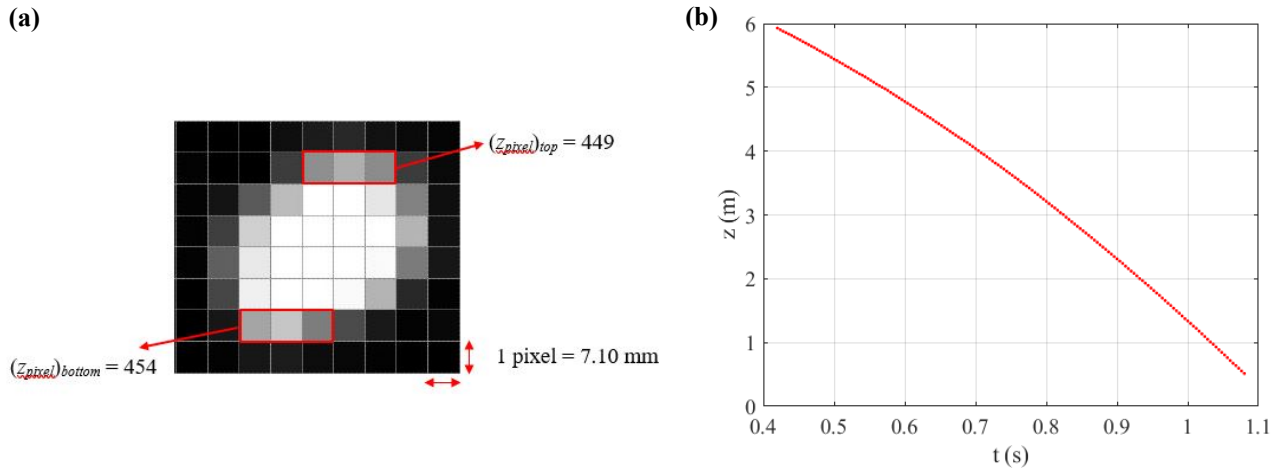

**Fig. 6: (a) Example of a position measurement for Hoary bat, and (b) plotted measurements of time vs. position**

#### 2.4 Velocity ( $w$ ) Estimates from Measured Position ( $z$ )

The time vs. position data obtained from high-speed imaging was used to calculate the fall velocity ( $w$ ) using the central-differencing numerical scheme (Chapra and Canale (1988)). The numerical scheme for determining vertical velocity at  $i^{\text{th}}$  time instant is given by:

$$w(i) = \frac{z(i+1) - z(i-1)}{2(\Delta t)} \quad (7)$$

where  $z(i-1)$  and  $z(i+1)$  represent the carcass position at  $(i-1)^{\text{th}}$  and  $(i+1)^{\text{th}}$  time, respectively. Figure 7 shows the velocity computations obtained by applying the central-differencing scheme on the measured position data. The falling objects reach their terminal velocity,  $w_t$ , when the force of gravity is balanced by the aerodynamic drag force. However, because of the limited drop height, none of the carcasses attained terminal velocity during the experiments, as the data points of the measured velocity lie nowhere close to the terminal velocity region shown in Fig. 7. Since, the bat carcasses did not achieve terminal velocity during the experiments, it is not possible to calculate  $C_d$  by equating the drag force with the gravitational force. However, with the assumption of terminal velocity attainment at the end of the carcass fall trajectory, the drag and gravitational force can be equated to each other, in order to compute carcass  $C_d$ . The instantaneous velocity estimate at the end of a particular carcass drop experiment and corresponding  $C_d$  for the three discovered species are mentioned in Table 2.

**Table 2: Drag coefficient computed from the terminal velocity assumption**

| Species         | Velocity (m/s) | Drag coefficient |
|-----------------|----------------|------------------|
| Hoary bat       | 9.76           | 2.27             |
| Eastern Red bat | 7.97           | 3.10             |
| Evening bat     | 7.10           | 1.10             |

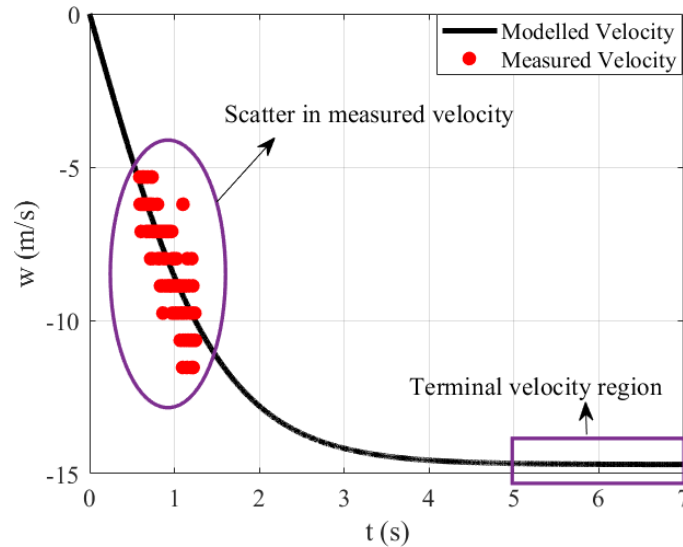

**Fig. 7: Measurements and modelled time vs. fall velocity for drop test #1 of Hoary bat**

260 Next, we compare the results in Table 2, to estimates of drag coefficient  $C_d$  obtained by fitting the ballistics model to  
the fall velocity data. However, as seen in Fig. 7, the velocity computed from the measured position at a temporal resolution  
of 0.004 s exhibits significant scatter. Based on careful observation of measured velocity, one notices a stratification in the  
velocity values as the measured velocity only attains few selective values. The scatter in the velocity measurements needs to  
be eliminated by filtering the raw position data at an appropriate coarsening window ( $\Delta t_c$ ) to obtain a scatter-free measured  
265 velocity dataset.

The analysis of the high – speed video of the carcass drop experiments showed that carcasses movement horizontally  
is negligible except for the Evening Bat carcass, which experienced oscillating lateral translation with an amplitude on the  
order of 10 cm, or about two and a half body lengths. Based on our observations, carcasses are assumed to fall along the  
vertical line at distance  $y_2$  from the wall. Figure 4 highlights snapshots of the Hoary bat carcass’ numerous orientation features  
270 at different time instants. These characteristics emerge because of carcass shape asymmetry and change in the carcass’

aerodynamics during the drop experiments from limited height, which ultimately prevents it from attaining the terminal velocity. The carcass fall dynamics' complex traits can be averaged by selecting the measured position values over an appropriate filtering window ( $\Delta t_c$ ). The scatter in measured velocity is due to the carcass displacements, measured with the high-speed camera, being small compared to the spatial resolution of the camera. An improved analysis methodology is required to obtain robust estimates of the carcass drag coefficient.

Mann et al. (1999) and Ott and Mann (2000) proposed a refined methodology for determining the position of the particles occupying more than one pixel in the image similar to the bat carcasses in the present study. This procedure demonstrated position estimation of particles in images with enhanced precision of 0.10 pixels – 0.02 pixels, by fitting a Gaussian function to the particle image based on grayscale intensity. This analysis methodology is recommended for high precision position measurements from images. This approach was demonstrated for images of Hoary bat drop #1 experiment. The carcass position measurements obtained from the refined methodology were found to be similar to the measurements from carcass top and bottom pixel coordinates, with the difference being of the order of 1.50 pixel. The detailed procedure and results of fitting the Gaussian distribution to pixel coordinate and intensity measurements of Hoary bat drop #1 experiment images is presented in the SI documentation.

285

## 2.5 Refined methodology for carcass drag coefficient estimation

The ballistics model defined by Eq. (1) is an initial value problem, where the initial condition for position ( $z_0$ ) and velocity ( $w_0$ ) is required to solve it analytically or numerically. Unfortunately, the carcass was dropped from a height above the field of view of the camera and therefore it was not visible in the recorded images. Therefore,  $z_0$  and  $w_0$  could not be directly determined. The uncertainty of  $z_0$  and  $w_0$  generated two additional unknown variables. As discussed earlier in Section 2.4, the measured velocity data obtained with high-speed imaging has significant scatter, which needs to be filtered to obtain scatter-free velocity to fit the ballistics model and compute a robust estimate of  $C_d$ . This may be performed by employing a multivariable optimization. We demonstrate an approach to find the optimal resolution ( $\Delta t_c$ ) of the measured data giving the best-fit to the ballistics model with optimized estimates of  $z_0$ ,  $w_0$  and  $C_d$  in the SI document, which contains the step by step description of the proposed multivariable optimization algorithm.

295

## 3 Results

The proposed  $C_d$  estimation algorithm based on multivariable optimization was applied to the measured velocity from the bat carcass drop experiments. The specific details of the optimization process are presented in the SI document. Table 3 summarizes the optimal filtering window ( $\Delta t_c$ ), initial position ( $z_0$ ), drag coefficient ( $C_d$ ), and terminal velocity ( $w_t$ ), obtained by applying the multivariable optimization algorithm to the measured velocity of carcass drop experiment for three bat species. On comparing  $C_d$  values from Table 2 and Table 3, it is apparent that there are significant differences in  $C_d$  estimates of Hoary

300

bat and Eastern Red bat from the two approaches. This confirms that heavier carcasses had not attained terminal velocity at end of the carcass drop experiment, which if assumed would lead to overestimated values of  $C_d$  for these species. However, for Evening bat,  $C_d$  estimates from the two approaches were found to be comparable, indicating the possibility of Evening bat nearly reaching terminal velocity during the last stages of fall when starting from a height of 7.20 m above the ground.

**Table 3: Optimal filtering window, initial position, drag coefficient, and terminal velocity**

| Species         | $\Delta t_c$ (s) | $z_0$ (m) | $C_d$ | $w_t$ (m/s) |
|-----------------|------------------|-----------|-------|-------------|
| Hoary bat       | 0.104 s          | 7.58      | 0.70  | 17.57       |
| Eastern Red bat | 0.152 s          | 7.63      | 0.80  | 15.67       |
| Evening bat     | 0.144 s          | 7.20      | 1.01  | 7.31        |

The accuracy of optimal  $z_0$  and  $C_d$  was tested by comparing the measured position and velocity at the optimal filtering window,  $\Delta t_c$ , to the analytical solution of position and velocity described by Eq. (3) and (4). Figure 8 displays the comparison of experimental observations with the analytical solution for position (left) and velocity (right) for Hoary bat (top row), Eastern Red bat (middle row) and Evening bat (bottom row). It is evident from the figure that the position and velocity measurements for optimum  $\Delta t_c$  are in good agreement with the analytical solution of position and velocity, obtained by using the optimized  $z_0$  and  $C_d$  values.

315

320

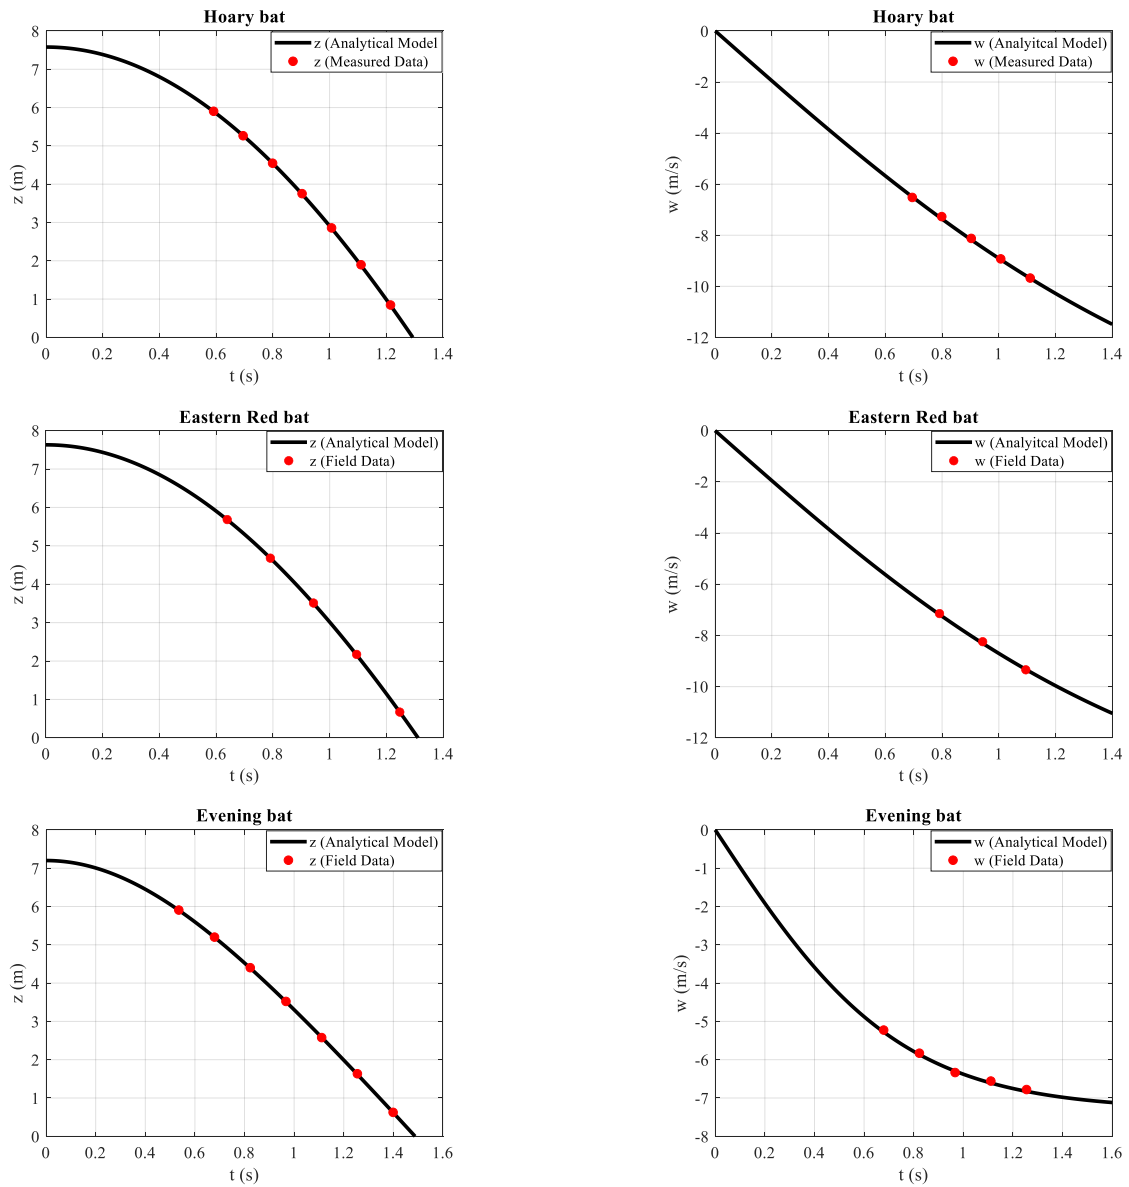

**Fig. 8: Comparison of position (left) and velocity (right) of the analytical solution and measured data for carcass drop tests of three bat species**

325

#### 4 Sensitivity of estimated drag coefficient to initial drop height

The sensitivity of  $C_d$  with respect to  $z_0$  is evaluated by perturbing the optimized  $z_0$  by a small amount ( $\pm 1\%$ ) and determining the percentage variation in optimized  $C_d$  estimates (with earlier reported  $\Delta t_c$ ). Table 4 presents the varied  $z_0$  values (column 2),



330 corresponding  $C_d$  estimates (column 3), and the percentage difference in  $C_d$  (column 4, considering optimized  $C_d$  in section 3 as the reference), for each bat species.

**Table 4: Drag coefficient sensitivity with respect to initial position**

| Species         | Initial position ( $z_0$ ) | Drag coefficient ( $C_d$ ) | % difference in $C_d$ |
|-----------------|----------------------------|----------------------------|-----------------------|
| Hoary bat       | 7.66 m (+1%)               | 0.79                       | 13                    |
|                 | 7.50 m (-1%)               | 0.60                       | 14                    |
| Eastern Red bat | 7.71 m (+1%)               | 0.85                       | 6                     |
|                 | 7.55 m (-1%)               | 0.70                       | 12                    |
| Evening bat     | 7.27 m (+1%)               | 1.01                       | 0                     |
|                 | 7.13 m (-1%)               | 0.99                       | 2                     |

335 It is evident that for Hoary and Eastern Red bat, even a small error of 1% in initial drop position can cause 6 – 14 % difference in  $C_d$ . This highlights the sensitivity of the analysis procedure, and it indicates the potential importance of the chaotic nature of carcass fall dynamics, particularly for Hoary and Eastern Red bat (heavy and large), when dropped from a limited height. However, in the case of Evening bat (light and small), the percentage change in  $C_d$  is only 2% for a 1% change in  $z_0$ . It is an important finding as 1% variation in  $z_0$  corresponds to approximately 7 cm, which is of the order of  $d_{eq}$  for the larger species. Depending on the initial orientation of carcass at  $t = 0$ , it is possible to have 1% difference in  $z_0$  which may lead to significant difference in the estimated  $C_d$  of carcasses.

340 The range of  $C_d$  for the three species investigated in this study were determined by implementing the proposed  $C_d$  estimation algorithm. Table 5 summarizes the range of measured  $C_d$  and terminal velocities for Hoary bat, Eastern Red bat and Evening bat, based on two drop experiments for each species. Overall, the range of  $C_d$  estimated for bat carcasses varied between 0.70 – 1.23. This  $C_d$  values found in the present study differ from the  $C_d$  range of 0.875 – 1.125 used by HM10, with a significantly wider range of possible values. Considering the limited sample size, in the case of a large sampling of carcass  
345 that include additional bat species, the range can be expected to be larger than that computed in the present study.

**Table 5: Sampled range of drag coefficients and terminal velocities for three species of bat carcasses**

| Species         | $C_d$       | $w_t$ (m/s)   |
|-----------------|-------------|---------------|
| Hoary bat       | 0.70 – 0.73 | 17.21 – 17.57 |
| Eastern Red bat | 0.74 – 0.80 | 15.67 – 16.30 |
| Evening bat     | 1.01 – 1.23 | 6.63 – 7.21   |

## 5 Sensitivity of carcass fall zone distributions to carcass mass and drag coefficient

The sensitivity of bat fall zone distributions, in the rotor plane (following the modelling approach of HM10) with respect to carcass mass and its drag coefficient was tested. Hoary and Evening bat were selected for this exercise because they are the  
350 heaviest and lightest bats, respectively. Figure 9 shows fall zone distributions for Hoary bat (upper row) and Evening bat

(lower row) for the highest and lowest values of  $C_d$ , respectively. The distributions were obtained by solving the 2-D ballistic trajectories in quiescent flow for bats assumed to be impacted by turbine blades within the rotor plane. However, there is no literature on the exact strike distribution of the bats on the rotor plane. Therefore, as a first approximation, bats were assumed to be distributed on the rotor plane at a radial resolution of 1 m and angular resolution of  $5^\circ$ , resulting in approximately 4000 bat carcasses striking the rotor. The coefficient of restitution ( $e$ ) was assumed as zero during the computations which means bat carcass attains the same velocity as the rotor at the point of impact, i.e., at impact the initial velocity of bat relative to the blade is zero. In these simulations, the rotor radius is 54 m, hub height is 80 m and the turbine RPM is 8.70.

355

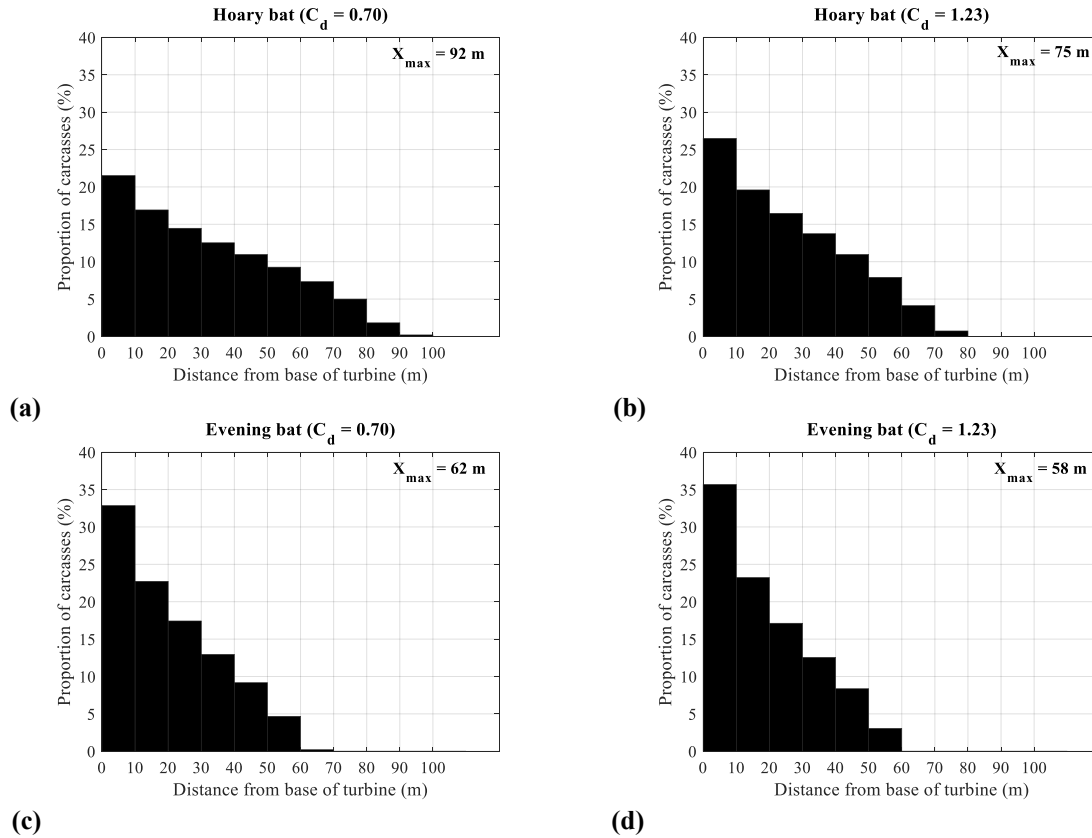

**Fig. 9: Carcass fall distributions for (a) Hoary bat ( $C_d = 0.70$ ) (b) Hoary bat ( $C_d = 1.23$ ) (c) Evening bat ( $C_d = 0.70$ ) (d) Evening bat ( $C_d = 1.23$ )**

360

It is evident from Fig. 9 that for the same mass (represented by species), the maximum in-plane fall distance ( $X_{max}$ ) varies significantly with  $C_d$  variation for Hoary bat (18% change). Increasing  $C_d$  results in smaller distance,  $X_{max}$ , for the same mass, whereas decrease in mass leads to reduction in  $X_{max}$  for the same  $C_d$ . Therefore, a heavy bat carcass with lower  $C_d$  will

attain a larger maximum fall distance (92 m), while a light bat carcass with greater  $C_d$  will attain a lesser maximum fall distance (58 m). The sensitivity analysis shown in Fig. 9 demonstrates the significance of drag coefficient in computing the upper bound  
365 on the maximum fall distance by the bat carcasses using the 2-D ballistics theory.

## 6 Summary and Conclusions

The goal of this research was to make the first measurements of drag coefficient for bat carcasses. This data will allow for robust modelling of carcass fall distributions around wind turbines to guide carcass surveys. Fresh bat carcasses (Hoary bat, Eastern Red bat and Evening bat) were discovered in the Macksburg wind farm and carcass drop experiments were performed.  
370 Carcass fall trajectories were measured with high-speed video. Due to the complex fall dynamics of carcasses and limited drop height, the irregular shaped carcasses did not reach terminal velocity. Therefore,  $C_d$  is estimated by finding the best-fit of the ballistics model to the measured velocity data. An initial value problem, the ballistics model requires the initial position ( $z_0$ ) and velocity ( $w_0$ ), which cannot be accurately recorded. The measured velocity data had significant scatter due to the high temporal resolution of the video. An appropriate filtering window ( $\Delta t_c$ ) was evaluated to obtain scatter-free measurements to  
375 fit the ballistics model. To compute the above-mentioned unknowns ( $\Delta t_c, z_0, w_0, C_d$ ), a multivariable optimization algorithm is proposed and implemented yielding  $C_d$  measurements for the carcasses of the three bat species. The first measurements of drag coefficient revealed a range of 0.70 – 1.23. The sensitivity of  $C_d$  with respect to  $z_0$  is tested by computing the percentage change in  $C_d$  with 1% change in  $z_0$ . It was found for Hoary bat and Eastern Red bat, that even a small difference ( $\sim 7$  mm) in  $z_0$  resulted in 6% - 14% difference in  $C_d$ . This demonstrates high sensitivity in  $C_d$  to estimate of drop height for bat carcass dropped from  
380 within 10 m of the ground.

The range of the maximum fall zone for the Hoary bat (heaviest) and Evening bat (lightest) were investigated with a ballistics model, and the sensitivity of the bat carcass fall zone distributions based on the measured carcass mass and range of drag coefficient were determined. Hoary bat, assuming the smallest  $C_d$  (0.70), resulted in a maximum fall distance of  $X_{max} = 92$  m, whereas Evening bat with largest  $C_d$  (1.23) resulted in a maximum fall distance of  $X_{max} = 58$  m. This demonstrates the  
385 relative effect of bat mass and carcass aerodynamics have significant influence on maximum distance travelled by bats after strike by a turbine blade.

The ballistics model framework proposed by HM10 generates a 1-D carcass fall zone distribution in the reference frame of the wind turbine rotor. In the future, the modelling framework can be extended by incorporating meteorological conditions such as wind speed and direction, resulting in a 2-D fall zone distribution to provide more realistic representation  
390 of the distribution of carcasses falling around the base of the turbine. The resulting distributions would provide useful information that can be compared to the carcass surveys to validate the ballistics model, and guide search efforts. The model can also be used to generate results useful for correcting survey data for limited or unsearched areas, for example, when carcass surveys are conducted only on road and pads.

395 **Code and data availability** Data and code can be made available upon request from the corresponding author.

**Author Contributions** SP conducted the study as part of his doctoral research supervised by CDM. CDM conceptualized the research, acquired financial support, and access to the equipment and facilities. SP conducted data analysis and produced final results, figures and original draft of the manuscript. SP and CDM collected the data, interpreted the analysis results, and  
400 reviewed and revised the final version of the manuscript.

**Competing Interests** The authors declare no conflict of interest.

### **Acknowledgements**

The study was conducted with financial support from MidAmerican Energy Company (MEC), and with input from scientists  
405 at the U.S. Fish & Wildlife Service (USFWS) in support of development of a Habitat Conservation Plan for Wind Energy Facilities in Iowa. The authors are grateful to Jesse Leckband, Senior Environmental Analyst at MEC for providing access to the wind farm facility and for procuring fresh bat carcasses for the experiments. We also thank Pablo Carrica, Ph.D., Professor of Mechanical Engineering and Research Engineer at IIHR-Hydroscience & Engineering, for help in collecting the data. The funders had no role in the study design, analysis of the data, decision to publish, or preparation of the manuscript.

### 410 **References**

- Arnett, E. B. (2005). Relationship between bats and wind turbines in Pennsylvania and West Virginia: An assessment of fatality and search protocols, patterns of fatality and behavioural interactions with wind turbines. Final report for Bats and Wind Energy Cooperative, by Bat Conservation International, Austin, Texas, USA.
- Arnett, E. B., Schirmacher, M., Huso, M. M. P. and Hayes, J. P. (2008). Effectiveness of changing wind turbine cut-in speed  
415 to reduce bat mortalities at wind facilities. An annual report submitted to the Bats and Wind Energy Cooperative. Bat Conservation International. Austin, Texas, USA.
- Arnett, E. B. et al. (2016). Impacts of wind energy development on bats: a global perspective. Pp. 295-323, in *Bats in the Anthropocene: Conservation of bats in a changing world*. Springer International Publishing AG, Cham, Switzerland. [https://doi.org/10.1007/978-3-319-25220-9\\_11](https://doi.org/10.1007/978-3-319-25220-9_11).
- 420 Biswas, S, Taylor, P. and Salmon, J. (2011). A model for ice throw trajectories from wind turbines. *Wind Energy*. DOI: 10.1002/we.519.
- Chapra, S. C. and Canale, R. P. (1988). *Numerical methods for engineers* (2<sup>nd</sup> edition), New York, McGraw-Hill, 812p.

- Cryan, P. M. (2011). Wind turbines as landscape impediments to the migratory connectivity of bats. *Environmental Law* 41: 355 – 370.
- 425 GAO (Government Accountability Office). (2005). *Wind Power: Impacts on wildlife and government responsibilities for regulating development and protecting wildlife*. GAO- 05-9006. Washington, DC.
- Erikson, W. P., Wolfe, M. M., Bay, K. J., Johnson, D. H., and Gehring, J. L. (2014). A comprehensive analysis of small passerine fatalities from collisions with turbine at wind energy facilities. *PLoS ONE*. 9:e107491. <https://doi.org/10.1371/journal.pone.0107491>.
- 430 Gauthreaux, S. A. (1996). Suggested practices for monitoring bird populations, movements and mortality in Wind Resource Areas. in *Proceedings of National Avian-Wind Power Planning Meeting II*. Palm Springs, California, 20-22 September 1995, prepared for the Avian Subcommittee of the National Wind Coordination Committee by RESOLVE Inc., Washington DC.
- Haider, A. and Levenspiel, O. (1989). Drag coefficient and terminal velocity of spherical and nonspherical particles. *Powder Technology*, 58, 63 – 70.
- 435 Hallam T. G., Federico, P. (2009). Applications of dynamic population models to bats. Pages 177–194 in Kunz T. H., Parsons, S., eds. *Ecological and behavioral methods for the study of bats*, 2nd ed. Johns Hopkins University Press.
- Hayes, M. A. (2013). Bats killed in large number of United States wind energy facilities. *BioScience*, 63: 975 – 979. <https://doi.org/10.1525/bio.2013.63.12.10>.
- Hedenström, A. and Liechti, F. (2001). Field estimates of body drag coefficient on the basis of dives in passerine birds. *J. Exp.*  
440 *Biol.*, 204, 1167-1175.
- Hotker, H., Thompson, K. M. and Jeromin, H. (2006). *Impacts on biodiversity of exploitation of renewable energy sources: The example of birds and bats. Facts, gaps in knowledge, demands for further research, and ornithological guidelines for the development of renewable energy exploitation*, Michael-Otto-Institut im NABU, Bergenhusen, Germany.
- Hull, C., and Muir, S. (2010). Search areas for monitoring bird and bat carcasses at wind farms using a Monte-Carlo model.  
445 *Australian Journal of Environmental Management*, 17:77–87. <https://doi.org/10.1080/14486563.2010.9725253>.
- Huso, M. M. P. and Dalthorp, D. (2014). Accounting for unsearched areas in estimating wind turbine-caused fatality. *The Journal of Wildlife Management*, 78 (2): 347-358. <https://doi.org/10.1002/jwmg.663>.
- Kingsley, A. and Whittam, B. (2007). *Wind Turbines and Birds: A background review for environmental assessment*. Prepared  
450 by Bird Studies Canada for Environment Canada / Canadian Wildlife Service.
- Kuik, G. A. M. V. et al. (2016). Long – term research challenges in wind energy – a research agenda by the European Academy of Wind Energy. *Wind Energ. Sci.*, 1, 1 – 39. [doi:10.5194/wes-1-1-2016](https://doi.org/10.5194/wes-1-1-2016).

- Kunz, T. H. et al. (2007). Ecological impacts of wind energy development on bats: Questions, research needs, and hypotheses. *Frontiers in Ecology & the Environment*. 5: 315–324. [https://doi.org/10.1890/1540-9295\(2007\)5\[315:EIOWED\]2.0.CO;2](https://doi.org/10.1890/1540-9295(2007)5[315:EIOWED]2.0.CO;2).
- 455 Kuvlesky, W. P. et al. (2007). Wind energy development and wildlife conservation: Challenges and opportunities. *Journal of Wildlife Management*. 71: 2487-2498. <https://doi.org/10.2193/2007-248>.
- Linderboom, H. J. et al. (2011). Short – term ecological effects of an offshore wind farm in the Dutch coastal zone; a compilation. *Environ. Res. Lett.* 6 (3); 035101. doi:10.1088/1748-9326/6/3/035101.
- Loss, S. R., Will, T. and Marra, P. P. (2013). Estimation of bird collision mortality at wind facilities in the contiguous United States. *Biological Conservation*. 168: 201 – 209.
- 460 Mann, J., Ott, S. and Anderson, J. S. (1999). Experimental study of relative, turbulent diffusion, Denmark. Forskningscenter Risoe. Risoe – R, No. 1036 (EN).
- NAS (National Academy of Sciences) (2007). Environmental Impacts of Wind-Energy Projects. The National Academies Press, Washington, D.C., USA. <https://doi.org/10.17226/11935>.
- 465 Noberg, U. M. (1976). Aerodynamics, Kinematics, and Energetics of Horizontal Flapping Flight in the Long-Eared Bat *Plecotus Auritus*, *J. Exp. Biol.*, 65, 179-212.
- Orloff, S. and Flannery, A. (1992). Wind turbine effects on avian activity, habitat use, and mortality in Altamont Pass and Solano County wind resources areas: 1989 – 1991. A report prepared for the California Energy Commission, pp. 1 – 199.
- Osborn et al. (2000). Bird mortality associated with wind turbines at the Buffalo Ridge wind resource area, Minnesota. *The American Midland Naturalist*, vol. 143, pp. 41-53. <https://www.jstor.org/stable/3082982>.
- 470 O’Shea T. J., Ellison L. E., Stanley T. R. (2004). Survival estimation in bats: Historic overview, critical appraisal, and suggestions for new approaches. Pages 297–336 in Thompson WL, ed. *Sampling Rare or Elusive Species: Concepts, Designs, and Techniques for Estimating Population Parameters*. Island Press.
- Ott, S. and Mann, J. (2000). An experimental investigation of the relative diffusion of particle pairs in three – dimensional turbulent flow. *J. Fluid Mech.*, vol. 422, pp. 207 – 223. DOI: <https://doi.org/10.1017/S0022112000001658>.
- 475 Smallwood, K. S. (2007). Estimating wind-turbine caused bird mortality. *Journal of Wildlife Management*, 71 (8), 2781 – 2791. <https://doi.org/10.2193/2007-006>.
- Smallwood, K. S. and Thelander, C. G. (2005). Bird mortality at the Altamont Pass Wind Resource Area. Final report to the California Energy Commission, Public Interest Energy Research-Environmental Area, 500-01-019, BioResource Consultants, 480 Ojai, California.

Sørensen, J. N. and Sarlak, H. (2015). Characterization of blade throw from a 2.3 MW horizontal axis wind turbine upon failure. AIAA Sci Tech, 53<sup>rd</sup> AIAA Aerospace Sciences Meeting, 5 – 9 January 2015, Kissimmee, Florida.

Thelander, C. G. and Rugge, L. (2000). Avian risk behaviour and fatalities at the Altamont Wind Resource Area. NREL/SR-500-27545, National Renewable Energy Laboratory, Lansdowne, Virginia, USA.

485 US Energy Information Administration (2018). Renewables and Carbon dioxide emissions.

WEST, Inc. (2016). Northern long – eared bat fall migration study. 200 south 2<sup>nd</sup> street, Laramie, Wyoming 82070.

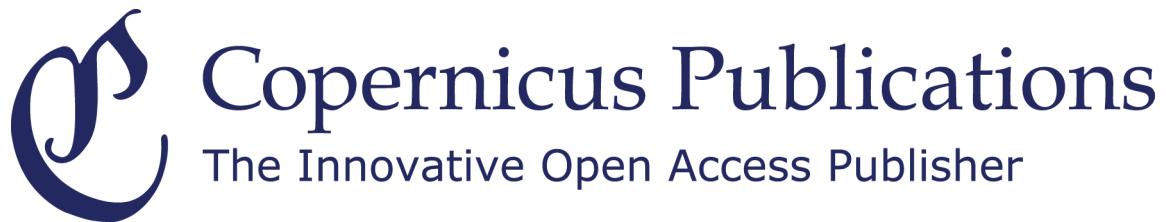

Supplement: Supplementary file [file wes-2019-33-AC3-supplement.pdf]
